# Supplementary material for: Probing molecular interactions of PEGylated chitosan in aqueous solutions using a surface force apparatus
Source: Royal Society of Chemistry journal article supplement (doi:10.1039/c9cp03189h), 2019-01-01
Supplement: c9cp03189h1.pdf [file c9cp03189h1.pdf]

## Supporting information

### Probing Molecular Interactions of PEGylated Chitosan in Aqueous Solutions Using Surface Forces Apparatus

Li Xiang<sup>1,‡</sup>, Lu Gong<sup>1,‡</sup>, Jiawen Zhang<sup>1</sup>, Ling Zhang<sup>1</sup>, Wenjihao Hu<sup>1</sup>, Wenda Wang<sup>1</sup>,

Qingye Lu<sup>2</sup>, Hongbo Zeng<sup>1,\*</sup>

<sup>1</sup>Department of Chemical and Materials Engineering, University of Alberta,  
Edmonton, AB, T6G 1H9, Canada.

<sup>2</sup>Department of Chemical and Petroleum Engineering, University of Calgary, Calgary,  
AB, T2N 1N4, Canada

\*Email: [Hongbo.Zeng@ualberta.ca](mailto:Hongbo.Zeng@ualberta.ca) ; phone: +1-780-492-1044

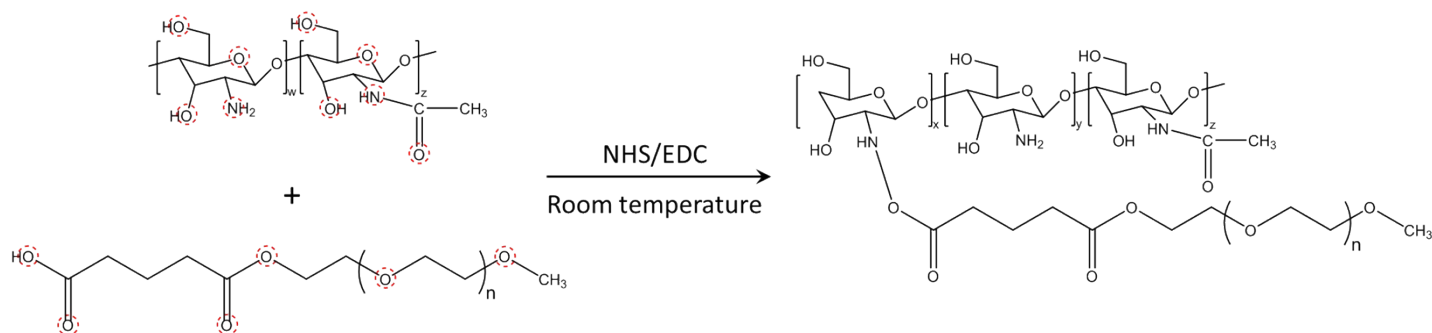

**Fig. S1.** The procedures to synthesize PEGylated chitosan and the hydrogen-bonding sites in PEGylated chitosan (red circle).

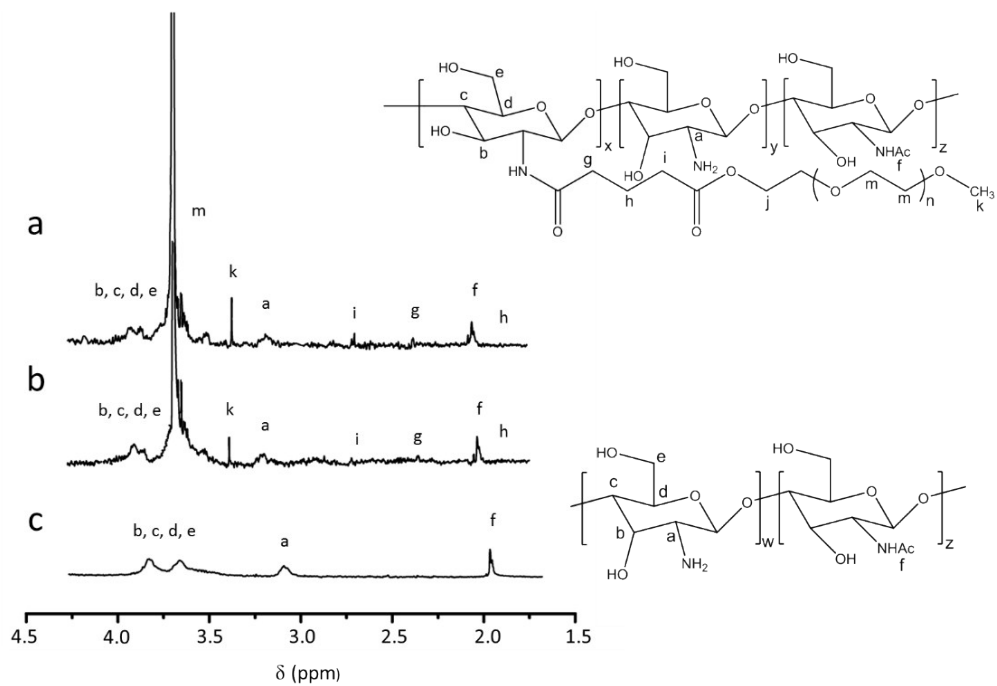

**Fig. S2.** <sup>1</sup>H NMR spectra analysis of (a) 10% PEGylated chitosan, (b) 5% PEGylated chitosan and (c) native chitosan.

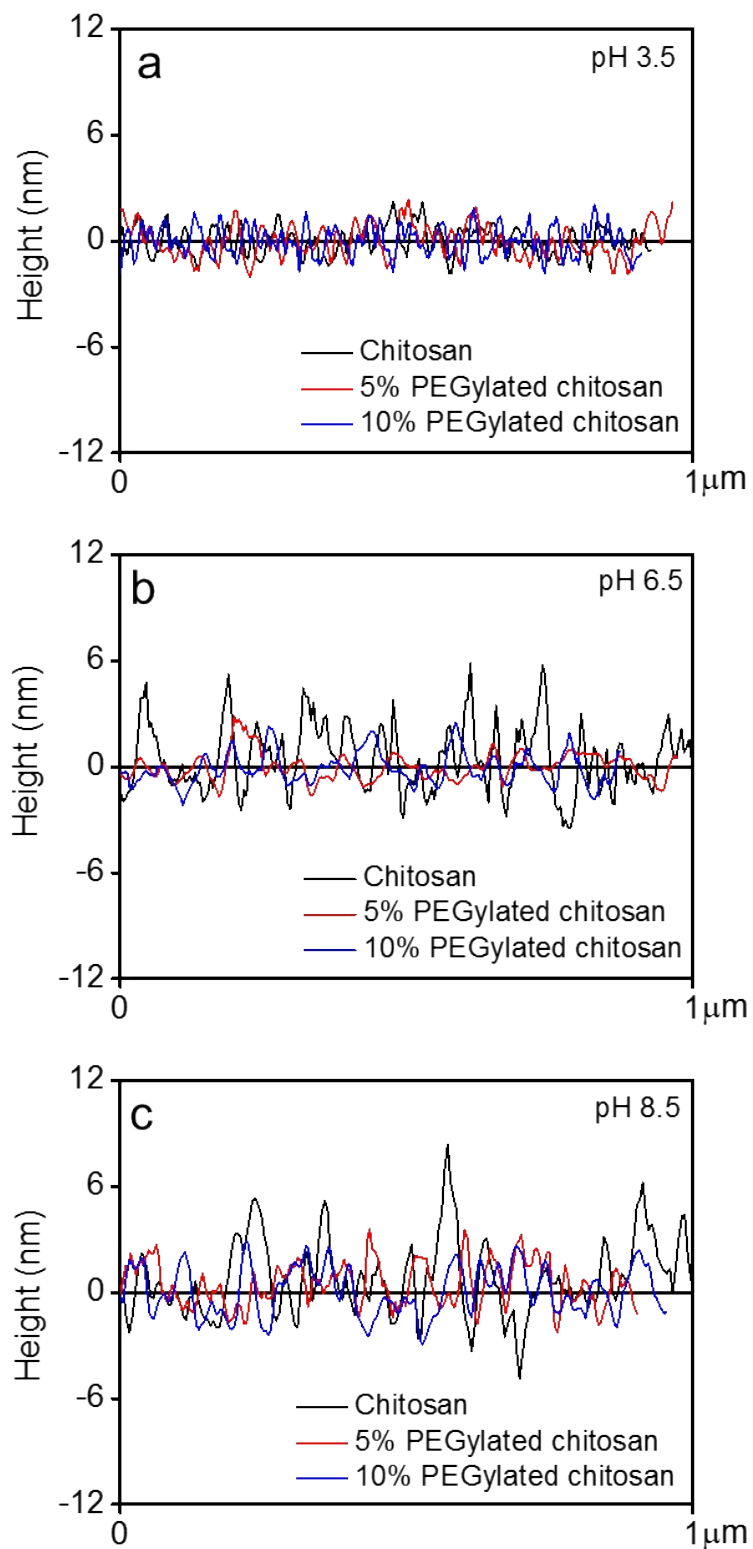

**Fig. S3.** Cross-section profiles of chitosan/PEGylated coatings at a) pH 3.5, b) pH 6.5 and c) pH 8.5.
